“Insulin-like Growth Factor Pathway Genetic Polymorphisms, Circulating IGFI and IGFBP3, and Prostate Cancer Survival” now appears in the May 2014 issue with the following citation: JNCI J Natl Cancer Inst (2014) 106 (5): dju218 doi:10.1093/jnci/dju218.”
